# Supplementary material
Source: PubMed Central journal article supplement (PMC3011368)
Supplement: NIHMS260002-supplement-Supporting_information.pdf [file NIHMS260002-supplement-Supporting_information.pdf]

## Supporting information

### Uniform Beads with Controllable Pore Sizes for Biomedical Applications

Sung-Wook Choi,<sup>†</sup> Yi-Chun Yeh,<sup>†</sup> Yu Zhang, Hsing-Wen Sung, Younan Xia\*

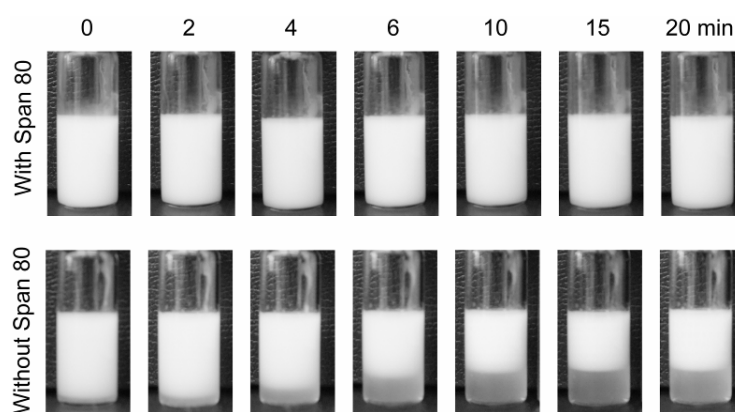

**Figure S1.** Photographs showing the phase separation of emulsions over time. An aqueous PVA (1 wt%) solution was emulsified in a PLGA (2 wt%) solution with or without Span<sup>®</sup> 80 surfactant (3 wt%).

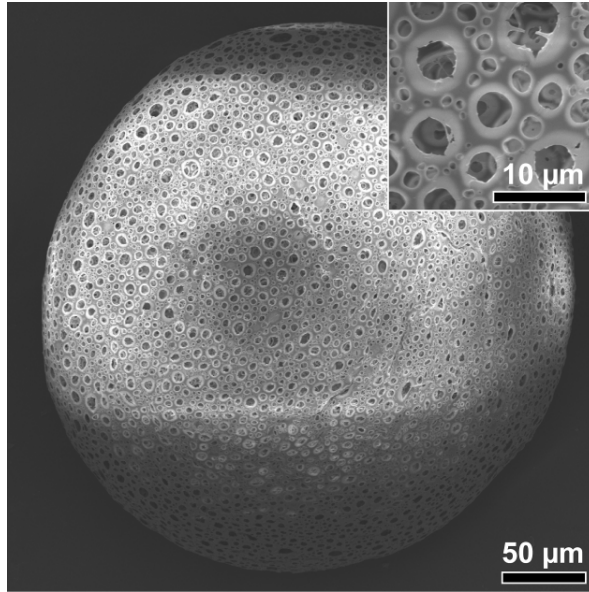

**Figure S2.** SEM image of a porous bead prepared using a stable emulsion. An aqueous PVA (1 wt%) solution was emulsified in a PLGA (2 wt%) solution with Span<sup>®</sup> 80 surfactant (3 wt%) in the oil phase. The inset is a magnified view of the surface of the bead.

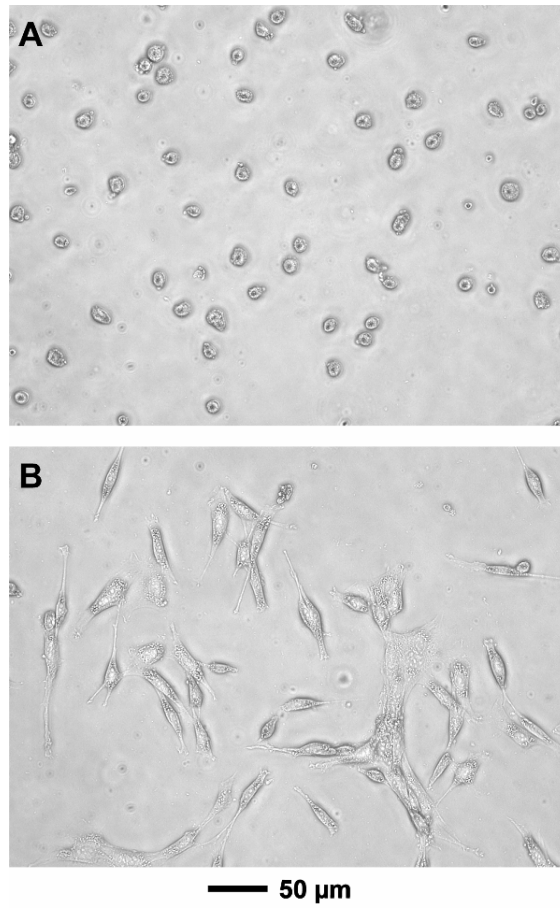

**Figure S3.** Optical micrographs of A) suspended and B) stretched fibroblasts.
